# Supplementary material for: A SNP variation in the Sucrose synthase (SoSUS) gene associated with sugar-related traits in sugarcane
Source: PeerJ. 2023 Dec 15;11:e16667. doi: 10.7717/peerj.16667 (PMC10726748; doi:10.7717/peerj.16667)
Supplement: Supplemental Information 7 [file peerj-11-16667-s007.xlsx]

## Sheet: Table S2
Table S2 –List of the 159 diverse sugarcane accessions used in the study to validate converted PACE markers.
No.	Varieties	Female	Male	Origin
1	3-2-023L	F160	Co775	Thailand
2	B41721			Barbados
3	B4744	Co421	B4098	Barbados
4	B76718			Barbados
5	Biotech1	CN1	S. spontaneum	Thailand
6	Biotech2	CN1	S. spontaneum	Thailand
7	Biotech3	CN1	S. spontaneum	Thailand
8	Biotech4			Thailand
9	Biotech5			Thailand
10	Biotech6			Thailand
11	BL4	POJ2878	Polycross	Sri Lanka
12	BO14	Co331	POJ2878	India
13	BO24	Co313	Co356	India
14	CAC57-23			Philippines
15	CN1	F160	Co775	Thailand
16	CO1148	P4383	Co301	India
17	CO1287	Co603	Co453	India
18	CO290	Co221	Kansar	India
19	CO331	Co213	Co214	India
20	CP110			USA
21	CP45-150	Co281	US1694	USA
22	CP61-39	CP55-38	CP48-103	USA
23	CP63-306	CP50-28	CP52-15	USA
24	CP72-120			USA
25	CP75-324			USA
26	CP75-330			USA
27	CP76-340			USA
28	D158	Co421	D166/34	Guyana
29	DB7160	Saipan17	B63118	Barbados
30	EBENC	Ebene1/34	M27/16	Mauritius
31	Eros	POJ2878	31MQ228	Australia
32	F140	PT43-52	CP34-79	Taiwan
33	F148	F138	PT48-21	Taiwan
34	F152	H32-8560	PT43-52	Taiwan
35	F153	NCo310	34-136	Taiwan
36	F170	CoL9	54-182	Taiwan
37	F174			Taiwan
38	F177	F108	Co290	Taiwan
39	FIJI105			Fiji
40	GALOA	LF 46/1902	CO290	Unknown
41	GT29			China
42	IAC49-131	CP27-108		Brazil
43	IAC51-205	POJ2878		Brazil
44	IAC52-156			Brazil
45	IRK67-1			Unknown
46	K84-200	ROC1	CP63-588	Thailand
47	K88-92	UT1	PL310	Thailand
48	K92-80	K84-200	K76-4	Thailand
49	K93-219	UT1	Ehaew	Thailand
50	K95-84	K90-79	K84-200	Thailand
51	K99-72	K84-200	Eheaw	Thailand
52	KK3	K84-200	85-2-352	Thailand
53	KKU99-01			Thailand
54	KKU99-02			Thailand
55	KKU99-03			Thailand
56	KKU99-06			Thailand
57	KPK98-40			Thailand
58	KPS01-12	Kps 94-13	UT3	Thailand
59	KPS01-25	Kps 94-13	UT3	Thailand
60	KWT3			China
61	LF48-8077			Fiji
62	LF76-2300			Fiji
63	LF78-960			Fiji
64	LF79-2964			Fiji
65	LK92-11	K84-200	Ehaew	Thailand
66	M124/59			Mauritius
67	M13/58			Mauritius
68	M147/158			Mauritius
69	MACKAY			Australia
70	MANA			Fiji
71	MOSSMAN			Australia
72	MP1	CoC88-011	Co87-025	Thailand
73	MP2	CoC67-1	Co88-005	Thailand
74	MP3	PT52-227	Q142	Thailand
75	MPT02-458			Thailand
76	MPT02-612			Thailand
77	MPT02-665			Thailand
78	MPT02-669			Thailand
79	MPT03-166			Thailand
80	MPT04-169			Thailand
81	MPT04-204			Thailand
82	MPT04-303			Thailand
83	MPT04-467			Thailand
84	MPT04-55			Thailand
85	MPT05-187			Thailand
86	MPT06-144			Thailand
87	MPT06-166			Thailand
88	MPT06-169			Thailand
89	MPT06-171			Thailand
90	MPT06-26			Thailand
91	MPT06-344			Thailand
92	MPT06-362			Thailand
93	MPT06-367			Thailand
94	MPT07-1			Thailand
95	MPT07-152			Thailand
96	MPT07-71			Thailand
97	MPT08-191			Thailand
98	MPT08-3			Thailand
99	MPT08-50			Thailand
100	MPT09-118			Thailand
101	MPT09-204			Thailand
102	MPT09-296			Thailand
103	MPT10-54			Thailand
104	MPT11-181			Thailand
105	MPT11-82			Thailand
106	MPT12-141			Thailand
107	MPT12-1782			Thailand
108	MPT13-118			Thailand
109	MPT14-1-172	K93-219	KpK98-40	Thailand
110	MPT14-1-180	K93-219	KpK98-40	Thailand
111	MPT14-1-468	K93-219	KpK98-40	Thailand
112	MPT14-1-504	K93-219	KpK98-40	Thailand
113	MPT14-1-546	K93-219	KpK98-40	Thailand
114	MPT14-1-857	K93-219	KpK98-40	Thailand
115	MPT14-1-892	K93-219	KpK98-40	Thailand
116	MPT14-1-902			Thailand
117	MPT14-1-976	K93-219	KpK98-40	Thailand
118	MPT14-2-662	K93-219	TBy20-2248	Thailand
119	MPT14-5-216	UT1	KpK98-40	Thailand
120	MPT14-5-239	UT1	KpK98-40	Thailand
121	MPT14-6-63	KK3	TBy20-2248	Thailand
122	MPT14-9-133	LK92-11	LK95-124	Thailand
123	MPT99-1444			Thailand
124	MY55-14	CP34-79	B45181	Cuba
125	N50-211	POJ2725	Co285	South Africa
126	NCO310	Co421	Co312	South Africa
127	NCO382	POJ2725	Co301	South Africa
128	Phil66-07	Phil5460	Co440	Philippines
129	Pindar	Co270	33MQ157	Australia
130	PL310			Unknown
131	PR3067			USA
132	PSA63			Philippines
133	Q100	Trojan	Co475	Australia
134	Q115	NCo310	54N7096	Australia
135	Q117	Q77	58N829	Australia
136	Q146	62N1659	66C807	Australia
137	Q208	Q135	QN61-1232	Australia
138	Q47	Co290	POJ2878	Australia
139	Q77	H59-198	H39-3633	Australia
140	Q81	Trojan	M336	Australia
141	Q83	Trojan	M336	Australia
142	R397	Co281	V114	Reunion
143	ROC1	F146	CP58-48	Taiwan
144	ROC22			Taiwan
145	ROC7	F160	60-2321	Taiwan
146	SP50	SP074		Thailand
147	SP80	85-2-352	K84-200	Thailand
148	TBY20-2248	K83-74	K84-200	Thailand
149	TBY26-1255			Thailand
150	TUC725			Argentina
151	TUC74-6	L60-25	CP44-155	Argentina
152	UT1	F172		Thailand
153	UT12	SP80	UT3	Thailand
154	UT3	UT1	UT2	Thailand
155	UT5	87-2-1033		Thailand
156	UT6	87-2-973	83-2-888	Thailand
157	UT8	K84-200	UT3	Thailand
158	YASAWA	LF49-3863	36MQ2717	Fiji
159	Yuan Jiang			Unknown
