# Supplementary material for: A SNP variation in the Sucrose synthase (SoSUS) gene associated with sugar-related traits in sugarcane
Source: PeerJ. 2023 Dec 15;11:e16667. doi: 10.7717/peerj.16667 (PMC10726748; doi:10.7717/peerj.16667)
Supplement: Supplemental Information 8 [file peerj-11-16667-s008.xlsx]

## Sheet: Table S3
Table S3 –Details of SNP markers from a previous study (Khanbo et al., 2021), including sequence information of the 7 SNPs, their chromosomal location, position, region, and functional annotation.
Marker	Trait	Allele	Chromosome	Position	Region	Gene	Functional annotation	Sequence with SNPs position marked by closed bracket
GT-07-6152572	Pol, CCS	G/T	7	6152572	intron	LSD1	Protein LSD1	GTTATTTCCAAAACTCTCATTTATTCCGCGGGTTCACCAGATTCATCGAGGGAACGCAGAAGTGGATGGGGGAGAATGGAGATGAGGAGGAACAAAAAAAGAATTGCTTCAGGGAAGAACTCTATACATGTGCACTCAAAGCATCCTTTCAGAAGCTGCCTTCATAGGTGACCTCAGTATTTCCAGGGACACTATCAGCTGCTGGGCTTCTGCTCTGCACCAGGTGAGGCCTGAAGAGAGTGAAAATTAG[G/T]GGTTAATTTTCAACTTTCATGAGAAATACAAGTCGTTTTACAGTAAGAATAACAGTGAAATGATGTTAATCTTCTACAATATTATTGTTAAGTGCAACCTGATGGATGAATACTTACCCCAACTGATGTCACAAAATTGCAGAC…
CA-07-6152583	Fiber	C/A	7	6152583	intron			AACTCTCATTTATTCCGCGGGTTCACCAGATTCATCGAGGGAACGCAGAAGTGGATGGGGGAGAATGGAGATGAGGAGGAACAAAAAAAGAATTGCTTCAGGGAAGAACTCTATACATGTGCACTCAAAGCATCCTTTCAGAAGCTGCCTTCATAGGTGACCTCAGTATTTCCAGGGACACTATCAGCTGCTGGGCTTCTGCTCTGCACCAGGTGAGGCCTGAAGAGAGTGAAAATTAGGGGTTAATTTT[C/A]AACTTTCATGAGAAATACAAGTCGTTTTACAGTAAGAATAACAGTGAAATGATGTTAATCTTCTACAATATTATTGTTAAGTGCAACCTGATGGATGAATACTTACCCCAACTGATGTCACAAAATTGCAGACTGCGCATTTCA…
AG-02-9547239	Fiber	A/G	2	9547239	exon	CALR	Calreticulin	CCTTACAGGTAGCCTTTGAATCTATTCGTGTACTCTTTCTCCCTATCATATCTGATATTGTAGTTGTAGTTAACTTCATTCTTCTGTGCTGCAGCATTATGTTTGGACCAGATATCTGTGGGTACAGCACCAAGAAGGTTCACTCTATCCTGACCAAGGATGGCAAAAACCACTTGATCAAGAAGGATGTGCCTTGTGAAACTGATCAGTTGACTCATGTTTACACTTTGATCATCCATCCTGATGCAAC[A/G]TACAGCATTCTCATTGATAATGAAGAGAAGCAAACTGGCAGCATCTACGAGCACTGGGATATTCTTCCCCCTAAGCAAATCAAGGACCCAGAGGCTAAGAAGGTAAGGACTTAATATTTATTATTGTGTCTGAATTTCTTTGCT…
TC-10-10612727	Fiber	T/C	10	10612727	intron	SUS1	Sucrose synthase 1	GAGTTCAAGAAGATGTACAGTCTCATTGATGAGTACAACTTGAAGGGCCATATCCGGTGGATCTCAGCTCAGATGAACCGTGTCCGCAACGCTGAGTTGTACCGCTACATTTGTGACACGAAGGGAGCATTTGTGCAGGTACGTATACACACTTAATCTAATAAATCACTTCCAGGTTCCAACAATAGTGCAATCTAATTTCAGATAACGACAGTCATAGAGCTTGTGCAGGACTAAATTATTTTGTCAC[T/C]TTGTTTTTGTAGCCTGCATTCTATGAAGCATTCGGCCTGACTGTCATTGAGTCCATGACGTGCGGTTTGCCAACAATTGCAACCTGCCATGGTGGCCCTGCTGAAATAATTGTGGACGGGGTGTCTGGTTTGCACATTGATCCT…
TC-03-21574882	Pol, CCS	T/C	3	21574882	exon	RH	DEAD-box ATP-dependent RNA helicase 56	ATCATCACTTGCTTATCATGGGGAGTCATTTTGAAGATCTCCTGGACATCTCTGCGCATGTCTGGAGAATACATACACAAGTTATTAAGAGAACTGAATACTATGACACAGTGTGAAATGAAGAAATGGACTGGATACCATAAGGTTAAAATGAACTATAGCAAATATAGGAATTTGCCAGAGACAACACCCTACCAAGTGATTCAAGCATCTTGTCACATTCATCAAGAATGAAATGCCGCACATTCTT[T/C]AAGGGAAGGTCCTTATCTCTAGCTAGAGCCAGTATCCTTCCAGGCGTGCCAACCACAATATGGGGGCAGTCATTCTTCAACAGATCCTTGTGGTTTTTTATGTGAACACCACCATAGAAAACAGCTACTCTTAATTCAGGAAGG…
TC-07-16408144	Fiber	T/C	7	16408144	intron	KAN1	Transcription repressor KAN1	TATATACAACAGCACATGTATATTTACTAACGGCAAGCAGCCTTGCATTTATACCCGTAGTAGTAACAATTTTTCAAACAAACTTCTCTTCAGAGATCAATGGCTGCCACCAAGTGCATGCAATGCAGACACCCGCCATGTAGTTGGCGTATCATCCACTTTTGAGGTACCAATGTTAACGATCTTGTTGTTTCTCTTCAGTTTGTACCTCTCTCACGTACTAGCTCCATATACTAATATGATTGCGCAT[T/C]TGGTCAGGATATGGAGCCTTGTGGATCAGTTGGCTTGCAACAGGCACCCAGCCATGAAATGAGCTGCCCTACTCCTAGCCTGGAGTTCACGCTAGGGCGACCAAACTGGAACGGTGCAGAACATGACTAGCAGGGCTAGCTTGA…
AC-08-24227154	Fiber	A/C	8	24227154	exon	NHX7	Sodium/hydrogen exchanger 7	CTGTGCTGACACACTTGAGTGAGTATATTCAAAACCTCCAGAAGACTGGGCTGCTGGAAGAGAAGGAAATGGTCCAGTTAGATGATGCTCTGCAGGTAGCTGGAACATTATTTAACTAAATATGCCTATATGACTCTAGTAAGCTAAGCTAATTCACTTGGCAGACAGACTTGAAGAAGTTTCAGAGGAATCCACCAATAGTGAAAATGCCAAGAATTAGTGACCTTCTGAACACTCATCCTTTAGTTGG[A/C]GCGCTGCCTGCTGCTGCGCGTGATCCTTTGCTAAGAAATACAAAGGAAACCGTGCGAGGGCAGGGCACAGCGCTGTACAGGGAAGGATCCAGGCCAACCGGTATATGGCTTGTTTCTATTGGTGTAGTAAAGGTCAGTGTGCGC…
Red bold letters are actual SNPS (SNP alleles).
