# Supplementary material for: A SNP variation in the Sucrose synthase (SoSUS) gene associated with sugar-related traits in sugarcane
Source: PeerJ. 2023 Dec 15;11:e16667. doi: 10.7717/peerj.16667 (PMC10726748; doi:10.7717/peerj.16667)
Supplement: Supplemental Information 10 [file peerj-11-16667-s010.xlsx]

## Sheet: Table S5
Table S5 – Statistical analysis for the traits of the diverse population in different environments.
Trait	Env	Min	Max	Mean	SD	H2
Pol (%)	2018KKU	7.76	21.84	15.8502	2.59399	63.23
	2019KKU	5.58	18.22	13.0976	2.52672	61.68
	2018MPT	2.9	20.86	15.5104	2.86815	74.14
	2019MPT	3.81	20.62	15.1988	2.77693	95.9
CCS (%)	2018KKU	4.36	16.66	11.2567	2.33101	65.32
	2019KKU	0.84	12.7	7.9415	2.56024	60.16
	2018MPT	1.84	15.37	10.7901	2.65186	76.28
	2019MPT	2.82	15.82	10.3192	2.54433	72.82
Brix (%)	2018KKU	14.95	23.85	19.6459	1.84317	66.06
	2019KKU	15	23.06	18.8463	1.62965	70.46
	2018MPT	12.46	24.37	19.6106	1.96553	62.36
	2019MPT	12.67	23.5	19.7736	1.90478	97.35
Fiber (%)	2018KKU	10.01	22.41	14.1579	2.32714	87.35
	2019KKU	11.44	22.62	15.7112	2.1478	71.31
	2018MPT	9.84	25.09	14.0188	2.3243	82.4
	2019MPT	9.91	30.02	14.1985	3.02875	53.1
Sugar yield (ton/rai)	2018KKU	0.15	3.44	1.2917	0.62824	81.93
	2019KKU	0.05	1.83	0.38	0.27832	67.61
	2018MPT	0.33	3.39	2.0202	0.61978	74.54
	2019MPT	0.03	2	1.0587	0.32491	34.34
Fiber yield (ton/rai)	2018KKU	0.31	5.24	1.6576	0.77975	95.67
	2019KKU	0.15	2.98	0.5821	0.46647	76.22
	2018MPT	1.21	5.16	2.6635	0.66861	66.55
	2019MPT	0.69	2.97	1.4011	0.36525	33.87
Cane diameter (cm)	2018KKU	1.27	3.5	2.5728	0.41893	92.63
	2019KKU	1.15	3.29	2.3168	0.42866	81.56
	2018MPT	1.31	3.91	2.8241	0.46498	83.25
	2019MPT	1.52	3.92	2.8234	0.47672	85.07
Cane weight (kg)	2018KKU	0.3	2.85	1.3001	0.49184	96.06
	2019KKU	0.17	0.97	0.4381	0.17587	69.24
	2018MPT	0.48	3.6	1.8731	0.58176	79.09
	2019MPT	0.21	1.32	0.713	0.23797	76.88
Cane length (cm)	2018KKU	98.68	329.17	217.6	36.0964	93.46
	2019KKU	55.83	167.75	108.48	21.8107	73.64
	2018MPT	227.38	410.96	302.8	34.6206	56.01
	2019MPT	100.83	276.92	178.29	26.9525	58.73
Node length (cm)	2018KKU	4.99	19.96	10.2032	1.86924	95.64
	2019KKU	3.42	12.52	7.2172	1.5819	82
	2018MPT	7.03	19.97	12.4452	1.88848	72.1
	2019MPT	6.43	17.48	11.4458	1.81731	68.75
Number of Node	2018KKU	15.5	28.48	21.533	2.69795	81.98
	2019KKU	9	23	15.3813	2.62208	68.41
	2018MPT	18.8	40.33	24.7571	2.92129	43.48
	2019MPT	11.17	26.83	16.0981	1.9021	34.8
Cane yield (ton/rai)	2018KKU	2.27	40.7	12.0475	5.90859	97.33
	2019KKU	1.55	27.95	4.885	3.67972	82.64
	2018MPT	8.48	29.42	18.7178	3.71743	69.18
	2019MPT	4.96	18.5	10.0557	2.22572	19.38
Env, environment; 2018, 2017-2018 cropping season; 2019, 2018-2019 cropping season; KKU, Khon Kaen; MPT, Mitr Phol Innovation and Research Centre; SD, standard deviation.
