# Supplementary material for: A SNP variation in the Sucrose synthase (SoSUS) gene associated with sugar-related traits in sugarcane
Source: PeerJ. 2023 Dec 15;11:e16667. doi: 10.7717/peerj.16667 (PMC10726748; doi:10.7717/peerj.16667)
Supplement: Supplemental Information 13 [file peerj-11-16667-s013.xlsx]

## Sheet: Table S8
Table S8 –Genotyping results of the 2 markers (mSoSUS1_SNPCh10.T/C, and mSoKAN1_SNPCh7.T/C, mean trait details in each allele locus and statistical analysis (t-test) of the mean trait difference between each genotype in the diverse population in different environments.
Env	Trait	Group	mSoSUS1_SNPCh10.T/C				mSoKAN1_SNPCh7.T/C
			N	Mean	SD	Sig.	N	Mean	SD	Sig.
2018KKU	Pol (%)	T/T	119	16.2399	2.28289	0.005*	116	15.6061	2.53348	0.065
		T/C	34	14.4774	3.21865		39	16.4987	2.7619
	CCS (%)	T/T	119	11.5408	2.1864	0.003*	113	11.0608	2.21723	0.116
		T/C	31	10.1277	2.62566		39	11.7459	2.64658
	Brix (%)	T/T	119	19.8176	1.78293	0.042*	116	19.5201	1.74793	0.187
		T/C	34	19.0865	1.98942		39	19.9751	2.14479
	Fiber (%)	T/T	119	13.9432	1.96003	0.032*	111	14.1732	2.34851	0.91
		T/C	29	15.3134	3.15141		39	14.2226	2.33744
	Sugar yield (ton/rai)	T/T	118	1.32653	0.621929	0.202	114	1.21167	0.611424	0.003*
		T/C	33	1.16788	0.654937		39	1.55154	0.631392
	Fiber yield (ton/rai)	T/T	118	1.59475	0.795112	0.071	112	1.58089	0.718702	0.035*
		T/C	30	1.888	0.759403		38	1.89342	0.945617
	Cane diameter (cm)	T/T	119	2.63303	0.357241	0.002*	116	2.54759	0.438511	0.203
		T/C	34	2.32206	0.510334		39	2.64718	0.361852
	Cane weight (kg)	T/T	119	1.35807	0.458049	0.002*	116	1.25276	0.492242	0.035*
		T/C	34	1.06971	0.532384		39	1.4459	0.48623
	Cane length (cm)	T/T	119	214.345	31.5247	0.081	116	217.869	38.654	0.883
		T/C	34	229.516	46.5409		39	216.876	29.0897
	Node length (cm)	T/T	119	9.99546	1.40833	0.036*	116	10.3332	2.01555	0.138
		T/C	34	11.095	2.85169		39	9.81462	1.37967
	Number of node	T/T	119	21.6018	2.65872	0.256	116	21.3093	2.89254	0.032*
		T/C	34	21.0132	2.63946		39	22.2246	2.01864
	Cane yield (ton/rai)	T/T	118	11.8441	6.14	0.413	114	11.4975	5.19578	0.023*
		T/C	33	12.8006	5.00573		39	13.9869	7.47315
2019KKU	Pol (%)	T/T	86	13.5908	2.25896	0.001*	80	12.9044	2.67643	0.321
		T/C	29	11.7414	2.84818		37	13.4055	2.17757
	CCS (%)	T/T	86	8.50628	2.2203	0.00*	80	7.72969	2.74534	0.271
		T/C	29	6.34103	2.88408		37	8.29297	2.1115
	Brix (%)	T/T	86	18.9601	1.5987	0.334	80	18.7813	1.65568	0.671
		T/C	29	18.6181	1.77005		37	18.9196	1.58709
	Fiber (%)	T/T	84	15.3146	1.68337	0.007*	74	15.7691	2.15308	0.743
		T/C	25	17.1048	2.94965		37	15.6254	2.19927
	Sugar yield (ton/rai)	T/T	103	0.400194	0.289699	0.192	98	0.370408	0.272226	0.494
		T/C	31	0.325161	0.242114		38	0.407105	0.299422
	Fiber yield (ton/rai)	T/T	101	0.551485	0.426271	0.072	97	0.582887	0.459585	0.864
		T/C	30	0.727667	0.587424		36	0.598611	0.501781
	Cane diameter (cm)	T/T	103	2.34757	0.404873	0.034*	98	2.28684	0.429895	0.205
		T/C	31	2.16194	0.475131		38	2.39158	0.430145
	Cane weight (kg)	T/T	103	0.448641	0.176663	0.177	97	0.448041	0.184123	0.443
		T/C	30	0.398667	0.179419		38	0.422105	0.153026
	Cane length (cm)	T/T	103	106.721	20.7066	0.025*	98	110.021	22.71	0.178
		T/C	31	116.715	24.2016		38	104.337	19.894
	Node length (cm)	T/T	103	7.10068	1.46457	0.113	98	7.23745	1.69372	0.776
		T/C	31	7.70839	1.9315		38	7.15026	1.33012
	Number of node	T/T	103	15.3883	2.7555	0.816	98	15.5816	2.6474	0.175
		T/C	31	15.5161	2.35047		38	14.8947	2.59719
	Cane yield (ton/rai)	T/T	103	4.86039	3.90927	0.628	98	4.75306	3.21825	0.402
		T/C	31	5.23161	3.02359		38	5.34816	4.75739
2018MPT	Pol (%)	T/T	120	15.9076	2.70551	0.001*	116	15.4418	2.72945	0.408
		T/C	35	14.1266	3.15965		40	15.8518	2.5964
	CCS (%)	T/T	119	11.264	2.26553	0.001*	116	10.6084	2.70017	0.252
		T/C	35	9.12429	3.29355		40	11.1675	2.4942
	Brix (%)	T/T	120	19.7578	2.00632	0.089	116	19.6266	1.89124	0.975
		T/C	35	19.1094	1.84852		40	19.6155	1.89226
	Fiber (%)	T/T	120	13.8383	2.01785	0.045*	112	14.0215	2.19716	0.459
		T/C	31	15.0284	3.02458		40	13.7245	2.09036
	Sugar yield (ton/rai)	T/T	119	2.13286	0.533136	0.000*	115	2.00443	0.658333	0.602
		T/C	34	1.60088	0.735434		40	2.0645	0.519037
	Fiber yield (ton/rai)	T/T	120	2.641	0.603396	0.372	116	2.69569	0.673712	0.186
		T/C	35	2.78029	0.854388		40	2.5395	0.536479
	Cane diameter (cm)	T/T	120	2.897	0.372066	0.002*	116	2.81233	0.477982	0.435
		T/C	35	2.526	0.621309		40	2.87825	0.397485
	Cane weight (kg)	T/T	120	1.95467	0.518132	0.003*	116	1.86638	0.602866	0.647
		T/C	35	1.55457	0.688632		40	1.91525	0.51246
	Cane length (cm)	T/T	120	301.94	31.8549	0.409	116	304.273	34.6696	0.226
		T/C	35	308.308	41.8373		40	296.67	32.4207
	Node length (cm)	T/T	120	12.4608	1.72896	0.752	116	12.5391	1.89587	0.45
		T/C	35	12.5763	2.38746		40	12.2753	1.90565
	Number of node	T/T	120	24.6646	3.01116	0.677	116	24.6585	2.70538	0.99
		T/C	35	24.8991	2.5801		40	24.6523	2.59776
	Cane yield (ton/rai)	T/T	120	19.1136	3.59217	0.008*	116	18.8166	3.90347	0.74
		T/C	35	17.2274	3.86911		40	18.5887	3.21816
2019MPT	Pol (%)	T/T	120	15.4066	2.70599	0.044*	116	15.2142	2.62333	0.737
		T/C	35	14.3326	2.88485		40	15.378	2.73727
	CCS (%)	T/T	119	10.6202	2.34952	0.002*	116	10.2499	2.56419	0.647
		T/C	35	9.146	2.87626		40	10.4655	2.55662
	Brix (%)	T/T	120	19.8408	1.91002	0.27	116	19.7927	1.79284	0.896
		T/C	35	19.4383	1.82866		40	19.837	1.96951
	Fiber (%)	T/T	120	13.6587	1.99007	0.004*	116	14.3251	3.25387	0.425
		T/C	35	16.2137	4.79542		40	13.8795	2.29329
	Sugar yield (ton/rai)	T/T	120	1.10292	0.325985	0.002*	115	1.06061	0.307041	0.992
		T/C	34	0.91	0.298329		40	1.06	0.331454
	Fiber yield (ton/rai)	T/T	120	1.38158	0.350805	0.088	115	1.41583	0.372507	0.302
		T/C	34	1.50353	0.415582		40	1.34575	0.356139
	Cane diameter (cm)	T/T	120	2.88617	0.399624	0.007*	116	2.80267	0.489781	0.236
		T/C	35	2.56514	0.628426		40	2.90525	0.409051
	Cane weight (kg)	T/T	120	0.747333	0.219559	0.001*	115	0.707217	0.238954	0.478
		T/C	34	0.586765	0.274135		40	0.73825	0.234312
	Cane length (cm)	T/T	120	177.846	23.2864	0.404	116	179.56	26.2714	0.13
		T/C	35	183.321	36.314		40	172.327	24.7409
	Node length (cm)	T/T	120	11.4399	1.65708	0.558	116	11.4128	1.80326	0.742
		T/C	35	11.6454	2.31499		40	11.5243	1.96013
	Number of node	T/T	120	16.0767	1.93141	0.613	116	16.2169	1.78579	0.02*
		T/C	35	16.2643	1.908		40	15.4865	1.38107
	Cane yield (ton/rai)	T/T	120	10.2523	2.34459	0.081	115	10.0787	2.13061	0.857
		T/C	34	9.48971	1.77343		40	10.0043	2.56635
Env, environment; 2018, 2017-2018 cropping season; 2019, 2018-2019 cropping season; KKU, Khon Kaen; MPT, Mitr Phol Innovation and Research Centre; SD, standard deviation.
*The mean difference is significant (Sig.) at the .05 level.
